# Supplementary material for: Reconstruction of the Foot and Ankle Using Pedicled or Free Flaps: Perioperative Flap Survival Analysis
Source: PLoS One. 2016 Dec 8;11(12):e0167827. doi: 10.1371/journal.pone.0167827 (PMC5145187; doi:10.1371/journal.pone.0167827)
Supplement: S3 Table — (XLSX) [file pone.0167827.s006.xlsx]

## Sheet: SA and logistic-Overall
Case No.	Flap types	Flap names	Length (cm)	Width (cm)	Donor site closure	Preoperative wound bed inflammation (0=No, 1=Yes)	Postoperative wound infection (0=No, 1=Yes)	Results (CS=complete survival, PN=partial necrosis, CN= complete necrosis)
1	Pedicle flap	Medial supramalleolar flap	12	5	FTSG	0	0	CS
2	Free flap	Free anterolateral thigh flap	16.5	10	FTSG	0	0	CS
3	Pedicle flap	Sural neurocutaneous flap	11	6	FTSG	1	1	PN
4	Pedicle flap	Antemalleolar flap	5	4	FTSG	0	0	CS
5	Pedicle flap	Sural neurocutaneous flap	18	12	FTSG	0	1	PN
6	Pedicle flap	Sural neurocutaneous flap	16	5	FTSG	1	0	CS
7	Pedicle flap	Sural neurocutaneous flap	8	7	FTSG	0	0	CS
8	Pedicle flap	Dorsal pedis flap	7	6	FTSG	0	0	CS
9	Free flap	Free anterolateral thigh flap	12	7	PC	0	0	CS
10	Free flap	Free anterolateral thigh flap	20	9	FTSG	0	0	CS
11	Pedicle flap	Medial supramalleolar flap	5.5	4	FTSG	1	1	PN
12	Pedicle flap	Posterior tibial artery perforator flap	10	5	FTSG	1	0	CS
13	Pedicle flap	Lateral supramalleolar flap	6	5	PC	0	0	CS
14	Pedicle flap	Lateral supramalleolar flap	8	5	FTSG	0	0	CS
15	Pedicle flap	Medial plantar flap	5	4	FTSG	0	0	CS
16	Pedicle flap	Posterior tibial artery perforator flap	5	3	PC	0	0	CS
17	Pedicle flap	Dorsal pedis flap	6	4	FTSG	1	1	PN
18	Pedicle flap	Sural neurocutaneous flap	12	6	FTSG	1	0	CS
19	Pedicle flap	Sural neurocutaneous flap	10	5	PC	0	0	CS
20	Pedicle flap	Peroneal artery perforator flap	10	5	FTSG	1	0	CS
21	Pedicle flap	Medial supramalleolar flap	8	4	PC	0	0	CS
22	Pedicle flap	Sural neurocutaneous flap	11	5	PC	1	1	CN
23	Pedicle flap	Peroneal artery perforator flap	9	8	PC	0	1	CN
24	Pedicle flap	First dorsal metatarsal artery flap	5	3	FTSG	0	0	CS
25	Pedicle flap	Sural neurocutaneous flap	8	4	PC	1	1	CN
26	Pedicle flap	Posterior tibial artery perforator flap	5	3	PC	1	0	CS
27	Pedicle flap	Sural neurocutaneous flap	8	7	FTSG	0	0	CS
28	Free flap	Free anterolateral thigh flap	14	10	FTSG	0	0	CS
29	Pedicle flap	Sural neurocutaneous flap	25	12	FTSG	0	0	CS
30	Pedicle flap	Sural neurocutaneous flap	11	7	FTSG	0	0	CS
31	Pedicle flap	Peroneal artery perforator flap	25	8	FTSG	0	0	CS
32	Free flap	Free anterolateral thigh flap	27	13	FTSG	0	0	CS
33	Pedicle flap	Sural neurocutaneous flap	19	17	FTSG	0	0	CS
34	Pedicle flap	Sural neurocutaneous flap	7	5	PC	0	0	CS
35	Free flap	Free anterolateral thigh flap	35	20	FTSG	0	0	CS
36	Pedicle flap	Peroneal artery perforator flap	14	8	FTSG	0	0	CS
37	Pedicle flap	Sural neurocutaneous flap	6	4	PC	0	0	CS
38	Pedicle flap	Peroneal artery perforator flap	21	10	FTSG	0	0	CS
39	Pedicle flap	Medial supramalleolar flap	5	5	PC	0	0	CS
40	Pedicle flap	Peroneal artery perforator flap	7	7	PC	0	0	CS
41	Pedicle flap	Medial supramalleolar flap	5	5	FTSG	0	0	CS
42	Free flap	Free anterolateral thigh flap	12	8	PC	0	0	CS
43	Pedicle flap	Sural neurocutaneous flap	5	3.5	PC	0	0	CS
44	Pedicle flap	Lateral supramalleolar flap	12	3	PC	1	1	CS
45	Free flap	Free anterolateral thigh flap	15	8	FTSG	0	0	CS
46	Pedicle flap	Sural neurocutaneous flap	8	6	FTSG	0	0	CS
47	Pedicle flap	First dorsal metatarsal artery flap	10	3	FTSG	0	1	CS
48	Free flap	Free anterolateral thigh flap	20	13	FTSG	0	0	CS
49	Pedicle flap	Sural neurocutaneous flap	6	5	FTSG	0	0	CS
50	Free flap	Free anterolateral thigh flap	12	8	PC	0	0	CS
51	Pedicle flap	Sural neurocutaneous flap	10	4.5	PC	1	0	CS
52	Pedicle flap	Medial plantar flap	4	3	FTSG	0	0	CS
53	Free flap	Free anterolateral thigh flap	28	14	FTSG	1	1	CS
54	Pedicle flap	Posterior tibial artery perforator flap	16	8	FTSG	0	0	CS
55	Free flap	Free anterolateral thigh flap	14	10	FTSG	1	0	CS
56	Free flap	Free anterolateral thigh flap	14	10	FTSG	0	0	CS
57	Pedicle flap	Sural neurocutaneous flap	6	4	PC	0	0	CS
58	Pedicle flap	Sural neurocutaneous flap	10	8	FTSG	0	0	CS
59	Pedicle flap	Peroneal artery perforator flap	14	12	FTSG	1	1	CN
60	Pedicle flap	Sural neurocutaneous flap	15	8	FTSG	0	0	CS
61	Pedicle flap	Peroneal artery perforator flap	20	5	PC	0	0	CS
62	Pedicle flap	Sural neurocutaneous flap	15	6	PC	0	0	CS
63	Free flap	Free anterolateral thigh flap	17	9	FTSG	0	0	CS
64	Free flap	Free anterolateral thigh flap	15	9	FTSG	0	0	CS
65	Pedicle flap	Gastrocnemius myocutaneous flap	10	5	FTSG	1	1	CN
66	Pedicle flap	Medial pedis flap	8	7	FTSG	0	0	CS
67	Pedicle flap	Sural neurocutaneous flap	5	5	PC	1	0	CS
68	Pedicle flap	Medial plantar flap	5	5	FTSG	1	1	PN
69	Free flap	Free anterolateral thigh flap	14	9	FTSG	0	1	CS
70	Pedicle flap	Medial plantar flap	6	5	FTSG	0	0	CS
71	Pedicle flap	Peroneal artery perforator flap	10	7	FTSG	1	1	PN
72	Pedicle flap	Posterior tibial artery perforator flap	17	8	FTSG	0	0	PN
73	Pedicle flap	Peroneal artery perforator flap	18	4	FTSG	0	0	PN
74	Pedicle flap	Sural neurocutaneous flap	5.5	4.5	PC	0	0	CS
75	Free flap	Free anterolateral thigh flap	16	9	FTSG	0	0	CS
76	Pedicle flap	Sural neurocutaneous flap	10	6	PC	1	0	CS
77	Pedicle flap	Sural neurocutaneous flap	15	10	FTSG	0	0	CS
78	Free flap	Free anterolateral thigh flap	16	9	FTSG	0	0	CS
79	Pedicle flap	Medial plantar flap	7	6	FTSG	1	0	CS
80	Free flap	Free anterolateral thigh flap	15	12	FTSG	1	0	CS
81	Pedicle flap	Posterior tibial artery perforator flap	9	7	FTSG	0	0	CS
82	Pedicle flap	Medial supramalleolar flap	8	6	FTSG	0	1	CS
83	Free flap	Free anterolateral thigh flap	14	10	FTSG	0	0	CS
84	Pedicle flap	Peroneal artery perforator flap	12	10	FTSG	0	1	PN
85	Pedicle flap	Posterior tibial artery perforator flap	8	6	FTSG	0	0	PN
86	Free flap	Free anterolateral thigh flap	16	11	FTSG	0	0	CS
87	Pedicle flap	Sural neurocutaneous flap	18	5	PC	0	0	CS
88	Pedicle flap	Sural neurocutaneous flap	25	9	FTSG	0	0	CS
89	Free flap	Free anterolateral thigh flap	16	10	FTSG	0	0	CS
90	Pedicle flap	Sural neurocutaneous flap	13	6	FTSG	0	0	CS
91	Pedicle flap	Dorsal pedis flap	6	5	FTSG	0	0	CS
92	Pedicle flap	Posterior tibial artery perforator flap	13	5	PC	0	0	CS
93	Pedicle flap	Sural neurocutaneous flap	16	8	FTSG	0	1	CS
94	Free flap	Free anterolateral thigh flap	12	9	PC	0	0	CS
95	Pedicle flap	Sural neurocutaneous flap	14	7	FTSG	1	1	PN
96	Pedicle flap	Medial plantar flap	4.5	3.5	FTSG	0	0	CS
97	Pedicle flap	Peroneal artery perforator flap	14	10	FTSG	1	0	CS
98	Free flap	Free anterolateral thigh flap	15	13	FTSG	0	0	CS
99	Free flap	Free anterolateral thigh flap	14	12	FTSG	1	1	CS
100	Free flap	Free anterolateral thigh flap	11.5	7.5	FTSG	1	0	CS
101	Free flap	Free anterolateral thigh flap	17	12	FTSG	1	0	CS
102	Free flap	Free anterolateral thigh flap	14	8	FTSG	1	1	CS
103	Free flap	Free anterolateral thigh flap	10	7	PC	1	0	CS
104	Free flap	Free anterolateral thigh flap	14	10	FTSG	1	1	CN
105	Free flap	Free anterolateral thigh flap	25	18	FTSG	0	1	CS
106	Free flap	Free anterolateral thigh flap	10	8	PC	0	0	CS
107	Pedicle flap	Posterior tibial artery perforator flap	14	7	FTSG	1	1	CN
108	Pedicle flap	Lateral supramalleolar flap	7	4	FTSG	1	0	CS
109	Free flap	Free anterolateral thigh flap	12	8	PC	1	1	CS
110	Free flap	Free anterolateral thigh flap	12	8	PC	0	0	CS
111	Free flap	Free anterolateral thigh flap	14	8	PC	0	0	CS
112	Free flap	Free anterolateral thigh flap	18	10	FTSG	1	0	CS
113	Pedicle flap	Sural neurocutaneous flap	10	6	PC	0	0	CS
114	Free flap	Free anterolateral thigh flap	12	7	PC	1	1	CS
115	Pedicle flap	Peroneal artery perforator flap	13	4	FTSG	0	0	CS
116	Free flap	Free anterolateral thigh flap	12	7	PC	1	1	CN
117	Pedicle flap	Sural neurocutaneous flap	11	6	FTSG	0	0	CS
118	Free flap	Free anterolateral thigh flap	14	10	FTSG	0	0	CS
119	Pedicle flap	Sural neurocutaneous flap	8	5	FTSG	0	0	CS
120	Free flap	Free groin flap	10	7	PC	0	0	CS
121	Free flap	Free anterolateral thigh flap	7	4	PC	0	0	CS
122	Free flap	Free anterolateral thigh flap	21	13	FTSG	1	0	CS
123	Free flap	Free anterolateral thigh flap	12	10	PC	1	0	CS
124	Free flap	Free groin flap	12	8	PC	1	0	CS
125	Free flap	Free anteromedial thigh flap	16	11	FTSG	0	0	CS
126	Free flap	Free anterolateral thigh flap	12	7	PC	0	0	CS
127	Free flap	Free medial plantar flap	13	7	FTSG	1	0	PN
128	Free flap	Free anterolateral thigh flap	9	7	PC	0	0	CS
129	Pedicle flap	Sural neurocutaneous flap	8	7	PC	1	0	CS
130	Pedicle flap	First dorsal metatarsal artery flap	4	3	FTSG	0	0	CS
131	Pedicle flap	Sural neurocutaneous flap	14	7	FTSG	0	0	CS
132	Pedicle flap	Peroneal artery perforator flap	22	9	FTSG	0	0	CN
133	Pedicle flap	Peroneal artery perforator flap	13	7	FTSG	0	0	CS
134	Free flap	Free groin flap	12	5	PC	0	0	CS
135	Pedicle flap	Sural neurocutaneous flap	10	4	PC	1	0	CS
136	Free flap	Free anterolateral thigh flap	16	5	PC	0	0	CS
137	Free flap	Free groin flap	10	8	PC	0	0	CS
138	Free flap	Free medial plantar flap	8	5	FTSG	0	0	CS
139	Free flap	Free anterolateral thigh flap	12	9	PC	0	0	CS
140	Free flap	Free anterolateral thigh flap	17	10	FTSG	0	0	CS
141	Free flap	Free anterolateral thigh flap	13	9	PC	0	0	CS
142	Free flap	Free medial plantar flap	8	6	FTSG	0	0	CS
143	Free flap	Free anterolateral thigh flap	14	9	PC	0	0	CS
144	Pedicle flap	Sural neurocutaneous flap	12	6	PC	0	0	CS
